# Supplementary material for: A Printable Device for Measuring Clarity and Colour in Lake and Nearshore Waters
Source: MDPI journal article supplement (doi:10.3390/s19040936), 2019-02-22
Supplement: s1 [file s1]

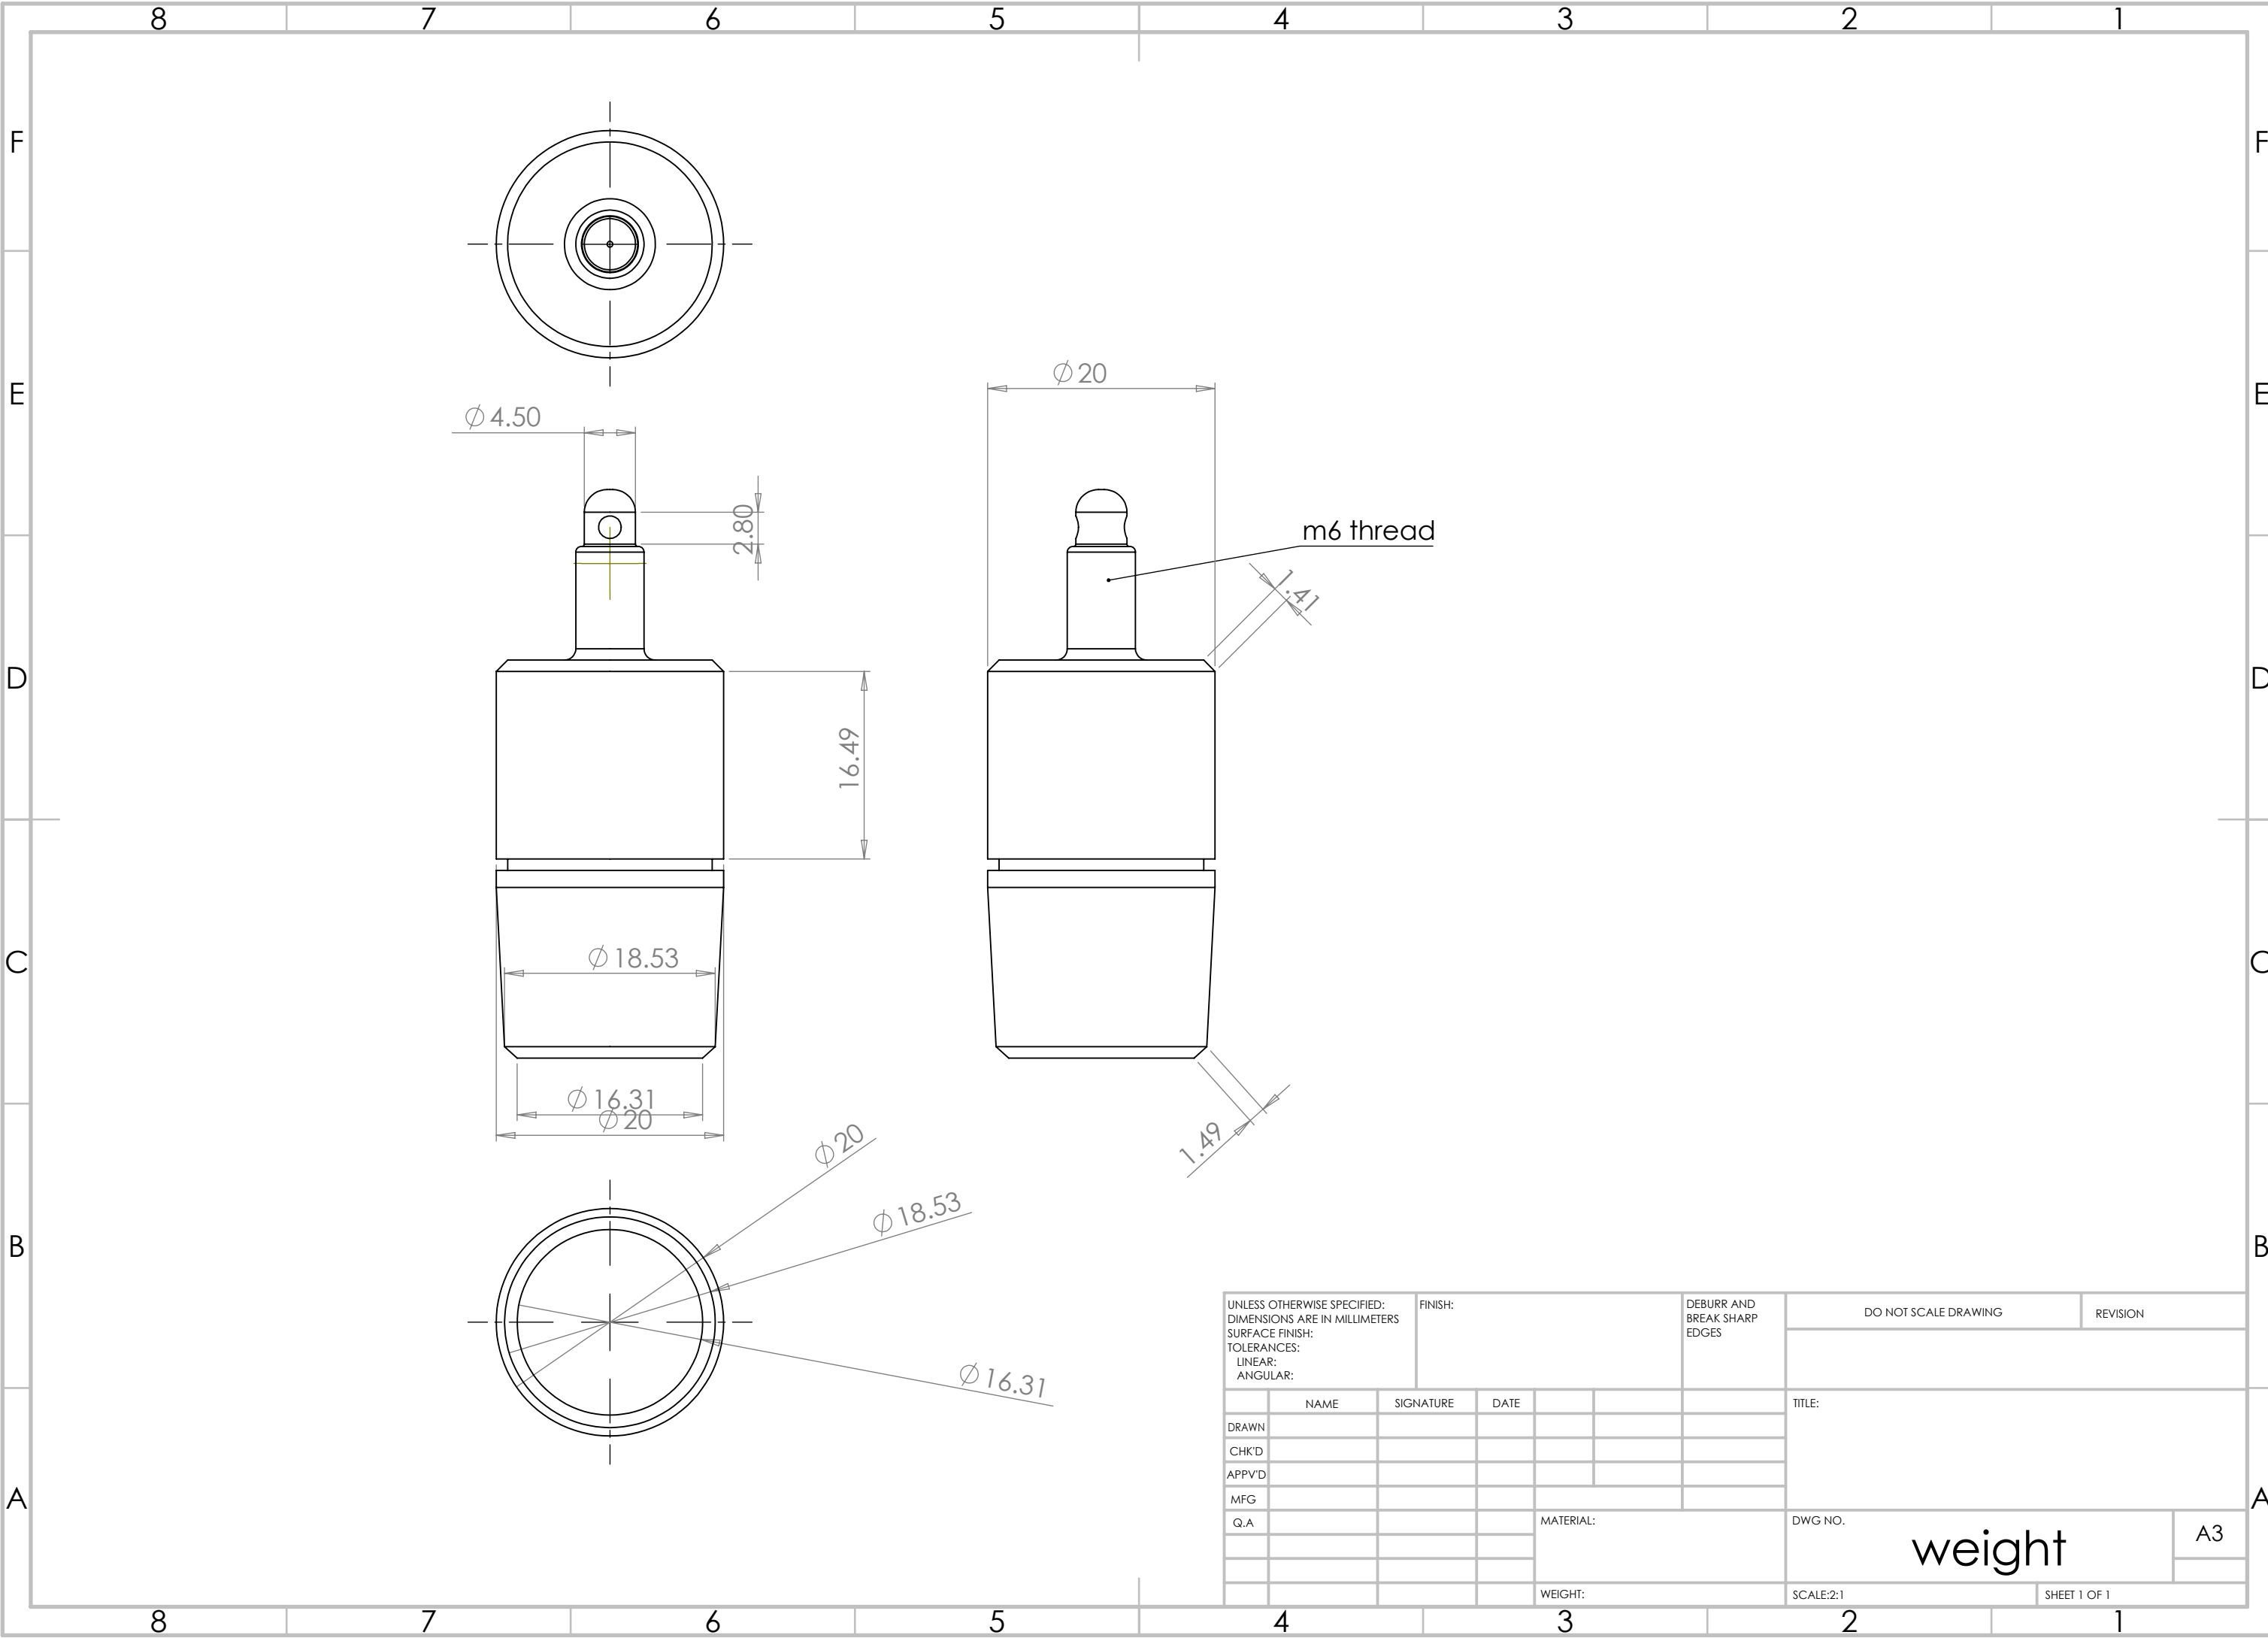

|                                                                                                                       |      |           |      |         |  |                                    |                      |  |              |
|-----------------------------------------------------------------------------------------------------------------------|------|-----------|------|---------|--|------------------------------------|----------------------|--|--------------|
| UNLESS OTHERWISE SPECIFIED:<br>DIMENSIONS ARE IN MILLIMETERS<br>SURFACE FINISH:<br>TOLERANCES:<br>LINEAR:<br>ANGULAR: |      |           |      | FINISH: |  | DEBURR AND<br>BREAK SHARP<br>EDGES | DO NOT SCALE DRAWING |  | REVISION     |
|                                                                                                                       |      |           |      |         |  |                                    |                      |  |              |
|                                                                                                                       | NAME | SIGNATURE | DATE |         |  |                                    | TITLE:               |  |              |
| DRAWN                                                                                                                 |      |           |      |         |  |                                    |                      |  |              |
| CHK'D                                                                                                                 |      |           |      |         |  |                                    |                      |  |              |
| APPV'D                                                                                                                |      |           |      |         |  |                                    |                      |  |              |
| MFG                                                                                                                   |      |           |      |         |  |                                    |                      |  |              |
| Q.A                                                                                                                   |      |           |      |         |  | MATERIAL:                          | DWG NO.              |  | A3           |
|                                                                                                                       |      |           |      |         |  |                                    |                      |  |              |
|                                                                                                                       |      |           |      |         |  | WEIGHT:                            | SCALE:2:1            |  | SHEET 1 OF 1 |

weight
