# Supplementary material for: A Printable Device for Measuring Clarity and Colour in Lake and Nearshore Waters
Source: MDPI journal article supplement (doi:10.3390/s19040936), 2019-02-22
Supplement: s1 [file s1]

# Supplementary Data: A Printable Device for Measuring Clarity and Colour in Lake and Nearshore Waters

Robert J.W. Brewin<sup>1,2,†,\*</sup>, Thomas G. Brewin<sup>3,†</sup>, Joseph Phillips<sup>3,4</sup>, Sophie Rose<sup>3,4</sup>, Anas Abdulaziz<sup>5</sup>, Werenfrid Wimmer<sup>6</sup>, Shubha Sathyendranath<sup>1,2</sup> and Trevor Platt<sup>1</sup>

<sup>1</sup> Plymouth Marine Laboratory, Plymouth, Devon, PL1 3DH, UK

<sup>2</sup> National Centre for Earth Observation, Plymouth Marine Laboratory, Plymouth, Devon, PL1 3DH, UK

<sup>3</sup> Chatham and Clarendon Grammar School, Ramsgate, Kent, CT11 9BB, UK

<sup>4</sup> Faculty of Science and Technology, Bournemouth University, Bournemouth, Dorset, BH12 5BB, UK

<sup>5</sup> CSIR-National Institute of Oceanography, Regional Centre Kochi, Kerala, 682018, India

<sup>6</sup> Ocean and Earth Science, National Oceanography Centre Southampton, University of Southampton, Southampton, Hampshire, SO14 3ZH, UK

† These authors contributed equally to this work

\*Correspondence: robr@pml.ac.uk; Tel.: +44-1752-633100

The following files are provided as supplementary data to the article. These files are provided under 5 folders.

## 1) Supplementary-data-1

This folder contains technical drawings of the two weights developed for the mini-Secchi device.

- Supplementary-data-1-weight.PDF
- Supplementary-data-1-weight-with-attachment.PDF

## 2) Supplementary-data-2

This folder contains STL files of the two weights developed for the mini-Secchi device.

- Supplementary-data-1-weight.STL
- Supplementary-data-1-weight-with-attachment.STL

## 3) Supplementary-data-3

This folder contains STL files of the casing, bobbin and handle for the mini-Secchi device.

- Supplementary-data-3-bobbin-bottom.STL
- Supplementary-data-3-bobbin-top.STL
- Supplementary-data-3-casing-side-1.STL
- Supplementary-data-3-casing-side-2.STL
- Supplementary-data-3-handle.STL
- Supplementary-data-3-handle-grip.STL

## 4) Supplementary-data-4

This folder contains an example vinyl print file of the Forel Ule colour scale for the mini-Secchi device.

- Supplementary-data-4-vinyl-print-colour-scale-example.pdf

## 5) Supplementary-data-5

This folder contains a technical drawing of the finger strap for the mini-Secchi device.

- Supplementary-data-5-finger-strap.PDF

These files are licensed under the Creative Commons Attribution-ShareAlike 4.0 International (CC BY-SA 4.0) License. To view a copy of the license, visit <https://creativecommons.org/licenses/by-sa/4.0/>.
