# Supplementary figures and images for: A Printable Device for Measuring Clarity and Colour in Lake and Nearshore Waters
Source: MDPI journal article supplement (doi:10.3390/s19040936), 2019-02-22

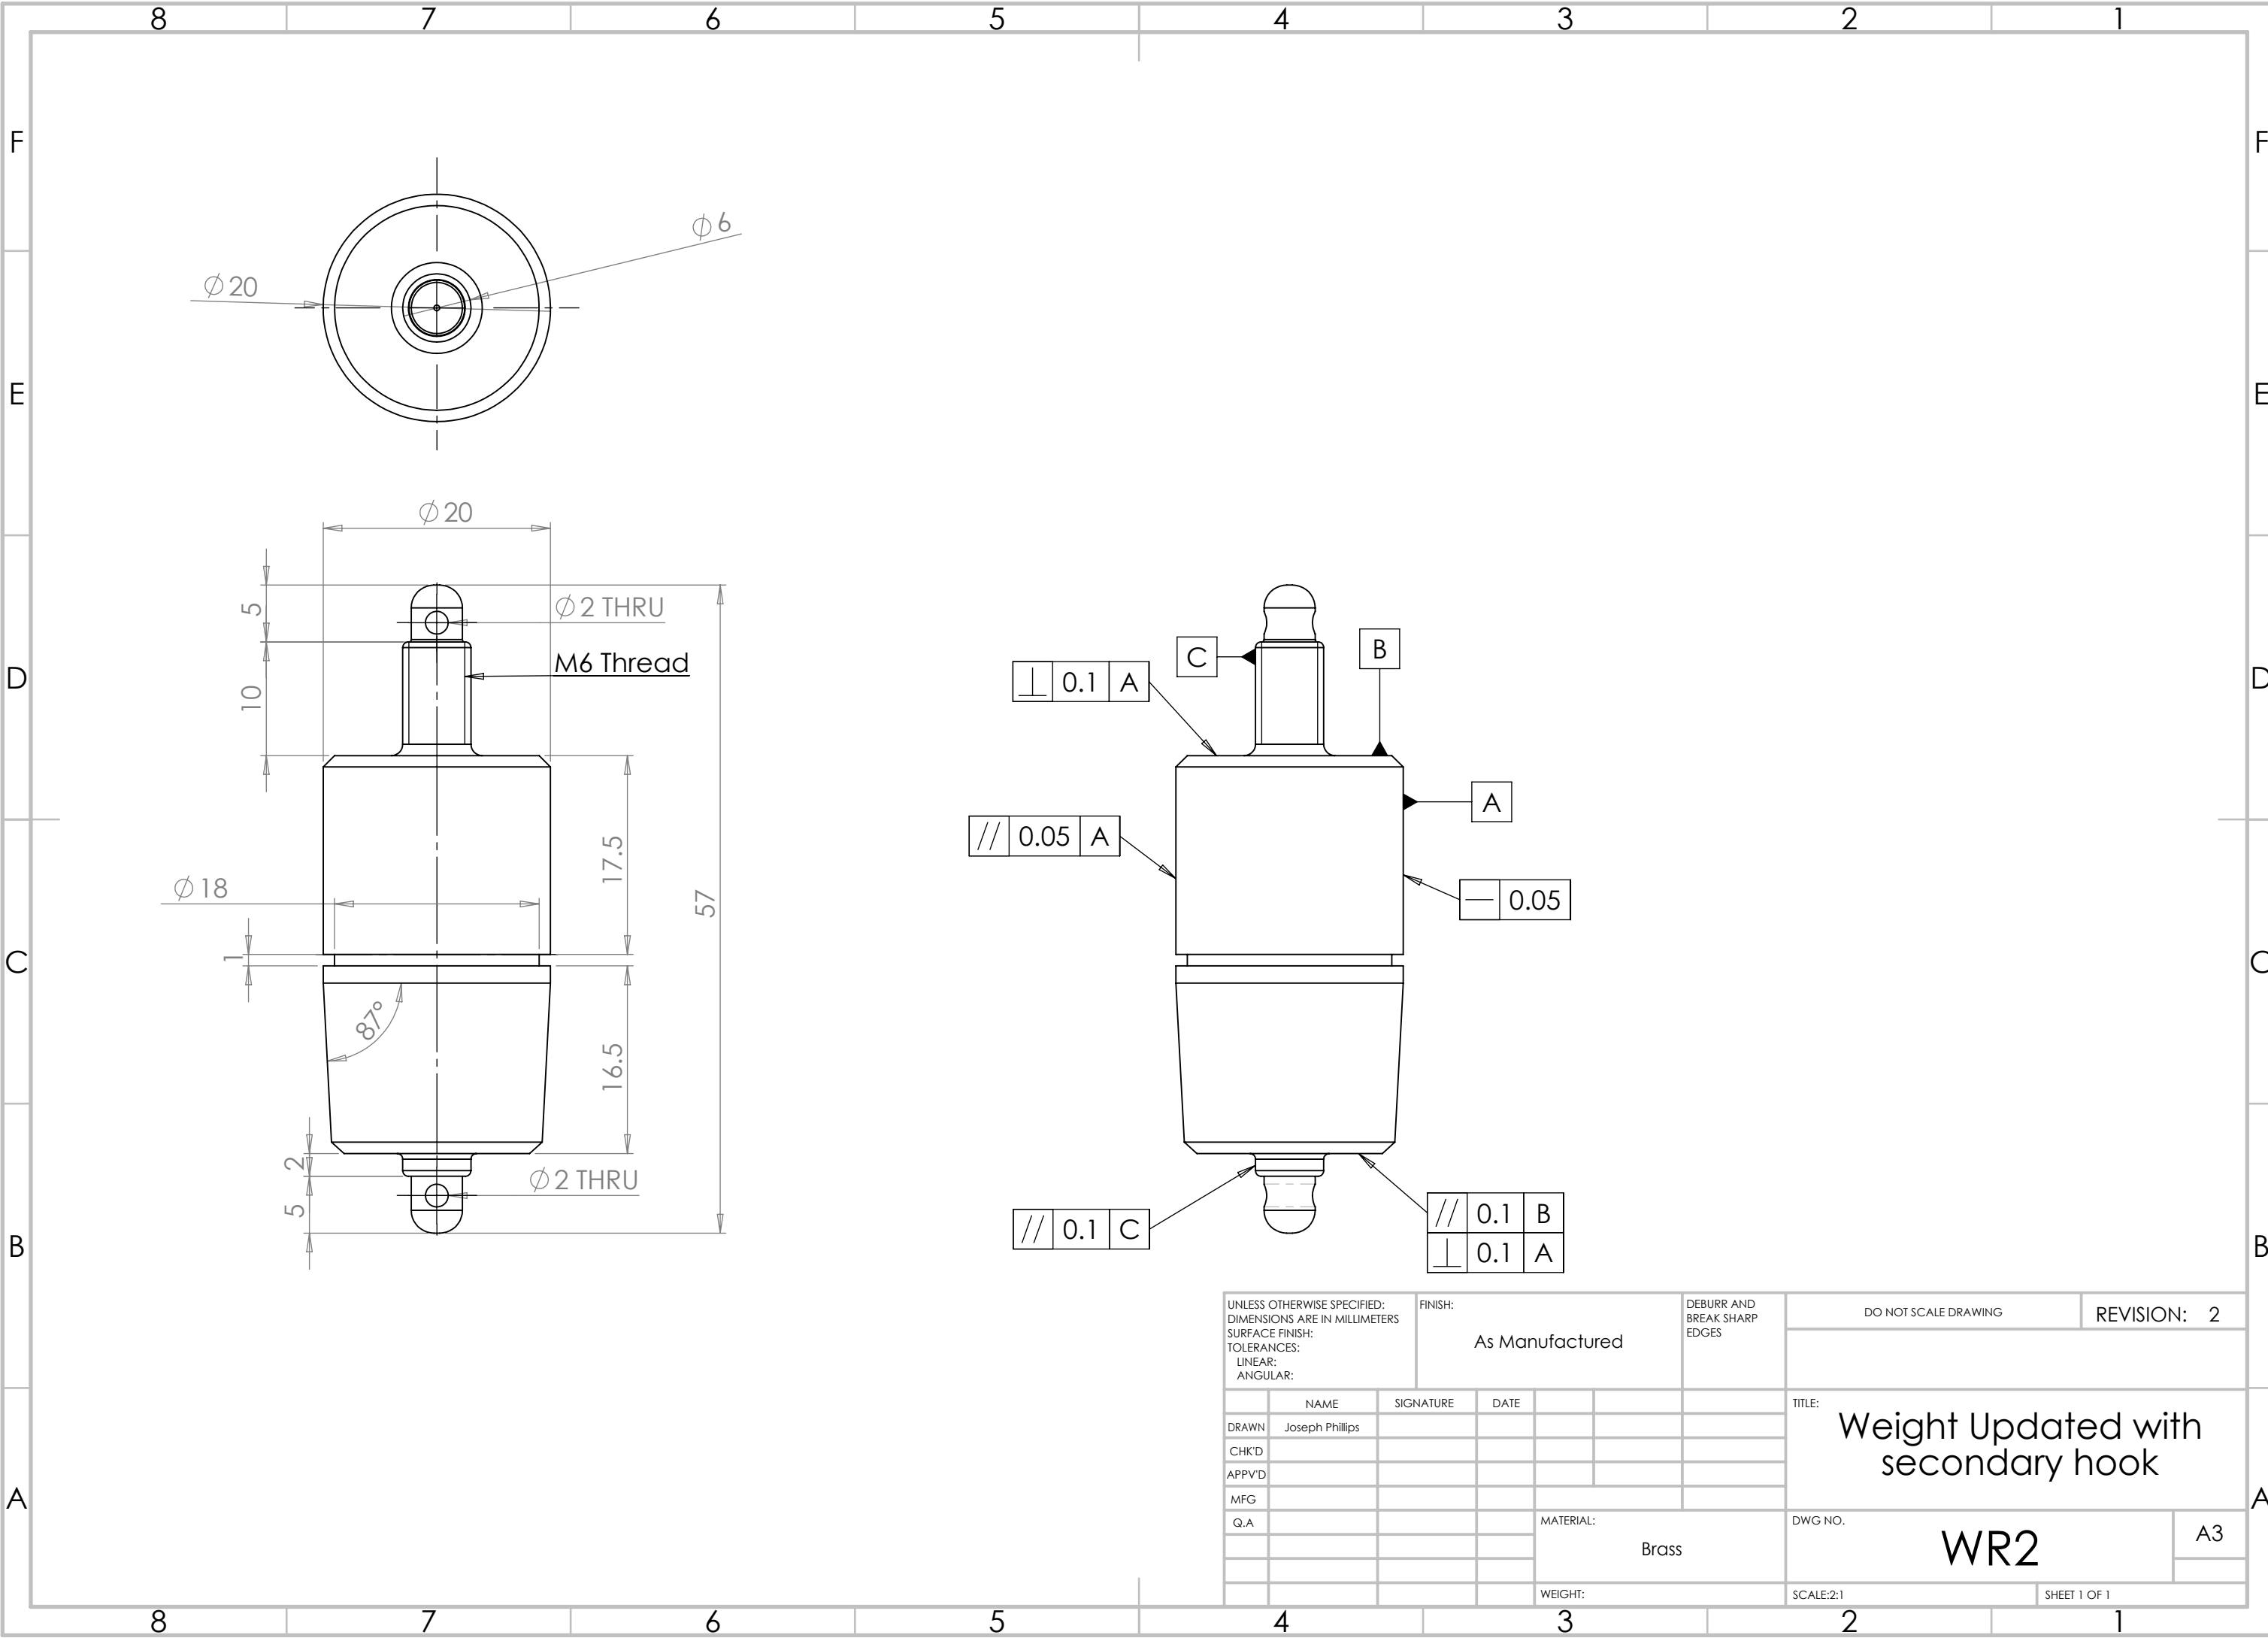

Supplement: s1 [file s1]

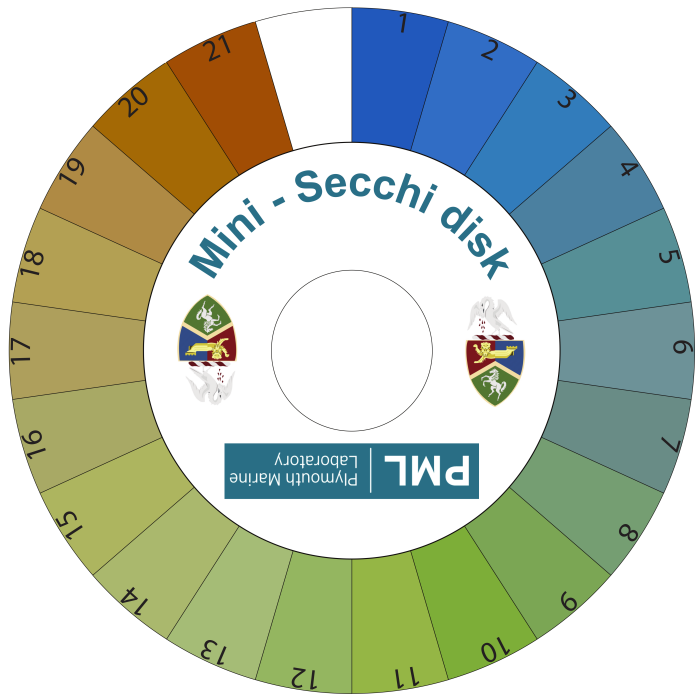

Supplement: s1 [file s1]
